# Supplementary material for: Effects of Waste Powder, Fine and Coarse Marble Aggregates on Concrete Compressive Strength
Source: MDPI journal article supplement (doi:10.3390/su142114388), 2022-11-03
Supplement: s1 [file s1]

## Supplementary Materials

**Table S1.** Database of compressive strength tests on concrete samples containing waste marble powder

| Reference         | Sample No | W/C  | Cem. Grade (MPa) | Cement (kg/m <sup>3</sup> ) | Max. Agg. Size (mm) | Coarse A. (kg/m <sup>3</sup> ) | Fine A. (kg/m <sup>3</sup> ) | Marble Powder (kg/m <sup>3</sup> ) | R    | M (%) | Sample | Curing Day | Con. Cu. Comp Str. (MPa) | Con. Exp. Inc. Str. (%) | Est. Inc. Str. (%) |
|-------------------|-----------|------|------------------|-----------------------------|---------------------|--------------------------------|------------------------------|------------------------------------|------|-------|--------|------------|--------------------------|-------------------------|--------------------|
| Amani et al. [27] | C1        | 0.45 | 53               | 300                         | 25                  | 950                            | 850                          | 0                                  | 0.53 | 0     | Cyl.   | 3          | 23.8                     | 0.0                     | -1.4               |
|                   | CM3       | 0.45 | 53               | 300                         | 25                  | 950                            | 765                          | 85                                 | 0.53 | 10    | “      | 3          | 21.2                     | -10.8                   | -7.3               |
|                   | CM2       | 0.45 | 53               | 300                         | 25                  | 950                            | 680                          | 170                                | 0.53 | 20    | “      | 3          | 19.8                     | -16.5                   | -14.4              |
|                   | CM1       | 0.45 | 53               | 300                         | 25                  | 950                            | 595                          | 255                                | 0.53 | 30    | “      | 3          | 17.6                     | -25.8                   | -22.6              |
|                   | C1        | 0.45 | 53               | 300                         | 25                  | 950                            | 850                          | 0                                  | 0.53 | 0     | “      | 7          | 27.9                     | 0.0                     | -1.4               |
|                   | CM3       | 0.45 | 53               | 300                         | 25                  | 950                            | 765                          | 85                                 | 0.53 | 10    | “      | 7          | 25.7                     | -7.9                    | -7.3               |
|                   | CM2       | 0.45 | 53               | 300                         | 25                  | 950                            | 680                          | 170                                | 0.53 | 20    | “      | 7          | 24.0                     | -14.1                   | -14.4              |
|                   | CM1       | 0.45 | 53               | 300                         | 25                  | 950                            | 595                          | 255                                | 0.53 | 30    | “      | 7          | 20.9                     | -25.0                   | -22.6              |
|                   | C1        | 0.45 | 53               | 300                         | 25                  | 950                            | 850                          | 0                                  | 0.53 | 0     | “      | 28         | 38.5                     | 0.0                     | -1.4               |
|                   | CM3       | 0.45 | 53               | 300                         | 25                  | 950                            | 765                          | 85                                 | 0.53 | 10    | “      | 28         | 36.2                     | -6.1                    | -7.3               |
|                   | CM2       | 0.45 | 53               | 300                         | 25                  | 950                            | 680                          | 170                                | 0.53 | 20    | “      | 28         | 34.1                     | -11.5                   | -14.4              |
|                   | CM1       | 0.45 | 53               | 300                         | 25                  | 950                            | 595                          | 255                                | 0.53 | 30    | “      | 28         | 30.4                     | -21.1                   | -22.6              |
|                   | C1        | 0.45 | 53               | 300                         | 25                  | 950                            | 850                          | 0                                  | 0.53 | 0     | “      | 90         | 42.5                     | 0.0                     | -1.4               |
|                   | CM3       | 0.45 | 53               | 300                         | 25                  | 950                            | 765                          | 85                                 | 0.53 | 10    | “      | 90         | 38.8                     | -8.7                    | -7.3               |
|                   | CM2       | 0.45 | 53               | 300                         | 25                  | 950                            | 680                          | 170                                | 0.53 | 20    | “      | 90         | 36.8                     | -13.3                   | -14.4              |
|                   | CM1       | 0.45 | 53               | 300                         | 25                  | 950                            | 595                          | 255                                | 0.53 | 30    | “      | 90         | 32.7                     | -22.9                   | -22.6              |
| Zaid et al. [33]  | W0-M0-S0  | 0.43 | 43               | 470                         | 25                  | 1050                           | 615                          | 0                                  | 0.63 | 0     | Cyl.   | 7          | 31.2                     | 0.0                     | 1.6                |
|                   | W0-M10-S0 | 0.43 | 43               | 470                         | 25                  | 1050                           | 554                          | 62                                 | 0.63 | 10    | “      | 7          | 32.6                     | 4.7                     | 6.7                |
|                   | W0-M20-S0 | 0.43 | 43               | 470                         | 25                  | 1050                           | 492                          | 123                                | 0.63 | 20    | “      | 7          | 34.3                     | 10.0                    | 10.6               |
|                   | W0-M30-S0 | 0.43 | 43               | 470                         | 25                  | 1050                           | 431                          | 185                                | 0.63 | 30    | “      | 7          | 35.3                     | 13.3                    | 13.2               |
|                   | W0-M0-S0  | 0.43 | 43               | 470                         | 25                  | 1050                           | 615                          | 0                                  | 0.63 | 0     | “      | 28         | 54.3                     | 0.0                     | 1.6                |
|                   | W0-M10-S0 | 0.43 | 43               | 470                         | 25                  | 1050                           | 554                          | 62                                 | 0.63 | 10    | “      | 28         | 58.8                     | 8.3                     | 6.7                |
|                   | W0-M20-S0 | 0.43 | 43               | 470                         | 25                  | 1050                           | 492                          | 123                                | 0.63 | 20    | “      | 28         | 60.0                     | 10.7                    | 10.6               |
|                   | W0-M30-S0 | 0.43 | 43               | 470                         | 25                  | 1050                           | 431                          | 185                                | 0.63 | 30    | “      | 28         | 63.5                     | 17.1                    | 13.2               |

|                                  |      |      |    |     |    |      |     |     |      |     |     |    |      |       |      |
|----------------------------------|------|------|----|-----|----|------|-----|-----|------|-----|-----|----|------|-------|------|
| Vigneshpandian<br>et al.<br>[34] | 0%   | 0.42 | 53 | 380 | 20 | 1290 | 710 | 0   | 0.65 | 0   | Cu. | 28 | 31.4 | 0.0   | 0.4  |
|                                  | 25%  | 0.42 | 53 | 380 | 20 | 1290 | 533 | 178 | 0.65 | 25  | “   | 28 | 33.0 | 5.1   | 9.1  |
|                                  | 50%  | 0.42 | 53 | 380 | 20 | 1290 | 355 | 355 | 0.65 | 50  | “   | 28 | 40.2 | 28.0  | -    |
|                                  | 100% | 0.42 | 53 | 380 | 20 | 1290 | 0   | 710 | 0.65 | 100 | “   | 28 | 29.3 | -6.8  | -9.3 |
| Varadharajan<br>[35]             | M000 | 0.40 | 43 | 487 | 20 | 1295 | 540 | 0   | 0.71 | 0   | “   | 7  | 17.6 | 0.0   | -1.7 |
|                                  | M100 | 0.40 | 43 | 487 | 20 | 1295 | 486 | 54  | 0.71 | 10  | “   | 7  | 18.5 | 5.6   | 9.7  |
|                                  | M200 | 0.40 | 43 | 487 | 20 | 1295 | 432 | 108 | 0.71 | 20  | “   | 7  | 21.2 | 20.5  | 19.9 |
|                                  | M300 | 0.40 | 43 | 487 | 20 | 1295 | 378 | 162 | 0.71 | 30  | “   | 7  | 22.4 | 27.8  | 28.9 |
|                                  | M000 | 0.40 | 43 | 487 | 20 | 1295 | 540 | 0   | 0.71 | 0   | “   | 28 | 22.6 | 0.0   | -1.7 |
|                                  | M100 | 0.40 | 43 | 487 | 20 | 1295 | 486 | 54  | 0.71 | 10  | “   | 28 | 23.2 | 2.6   | 9.7  |
|                                  | M200 | 0.40 | 43 | 487 | 20 | 1295 | 432 | 108 | 0.71 | 20  | “   | 28 | 27.5 | 21.7  | 19.9 |
|                                  | M300 | 0.40 | 43 | 487 | 20 | 1295 | 378 | 162 | 0.71 | 30  | “   | 28 | 29.4 | 30.2  | 28.9 |
| Sancheti<br>et al.<br>[36]       | CO   | 0.45 | 43 | 351 | 20 | 1176 | 722 | 0   | 0.62 | 0   | Cu. | 7  | 21.7 | 0.0   | 5.6  |
|                                  | MP05 | 0.45 | 43 | 351 | 20 | 1176 | 686 | 36  | 0.62 | 5   | “   | 7  | 23.9 | 9.8   | 7.9  |
|                                  | MP10 | 0.45 | 43 | 351 | 20 | 1176 | 650 | 72  | 0.62 | 10  | “   | 7  | 25.1 | 15.6  | 10.0 |
|                                  | MP15 | 0.45 | 43 | 351 | 20 | 1176 | 614 | 108 | 0.62 | 15  | “   | 7  | 24.4 | 12.2  | 11.7 |
|                                  | MP20 | 0.45 | 43 | 351 | 20 | 1176 | 578 | 144 | 0.62 | 20  | “   | 7  | 20.4 | -6.0  | -    |
|                                  | MP25 | 0.45 | 43 | 351 | 20 | 1176 | 542 | 181 | 0.62 | 25  | “   | 7  | 19.7 | -9.1  | -    |
|                                  | CO   | 0.45 | 43 | 351 | 20 | 1176 | 722 | 0   | 0.62 | 0   | “   | 28 | 31.8 | 0.0   | 5.6  |
|                                  | MP05 | 0.45 | 43 | 351 | 20 | 1176 | 686 | 36  | 0.62 | 5   | “   | 28 | 34.7 | 9.2   | 7.9  |
|                                  | MP10 | 0.45 | 43 | 351 | 20 | 1176 | 650 | 72  | 0.62 | 10  | “   | 28 | 36.7 | 15.2  | 10.0 |
|                                  | MP15 | 0.45 | 43 | 351 | 20 | 1176 | 614 | 108 | 0.62 | 15  | “   | 28 | 34.5 | 8.5   | 11.7 |
|                                  | MP20 | 0.45 | 43 | 351 | 20 | 1176 | 578 | 144 | 0.62 | 20  | “   | 28 | 30.2 | -5.1  | -    |
|                                  | MP25 | 0.45 | 43 | 351 | 20 | 1176 | 542 | 181 | 0.62 | 25  | “   | 28 | 28.3 | -11.1 | -    |
|                                  | CO   | 0.45 | 43 | 351 | 20 | 1176 | 722 | 0   | 0.62 | 0   | “   | 56 | 42.2 | 0.0   | 5.6  |
|                                  | MP05 | 0.45 | 43 | 351 | 20 | 1176 | 686 | 36  | 0.62 | 5   | “   | 56 | 46.0 | 9.1   | 7.9  |
|                                  | MP10 | 0.45 | 43 | 351 | 20 | 1176 | 650 | 72  | 0.62 | 10  | “   | 56 | 48.8 | 15.7  | 10.0 |
|                                  | MP15 | 0.45 | 43 | 351 | 20 | 1176 | 614 | 108 | 0.62 | 15  | “   | 56 | 46.1 | 9.2   | 11.7 |
|                                  | MP20 | 0.45 | 43 | 351 | 20 | 1176 | 578 | 144 | 0.62 | 20  | “   | 56 | 40.1 | -5.0  | -    |

|                           |      |      |    |     |    |      |     |     |      |    |     |    |      |       |      |
|---------------------------|------|------|----|-----|----|------|-----|-----|------|----|-----|----|------|-------|------|
|                           | MP25 | 0.45 | 43 | 351 | 20 | 1176 | 542 | 181 | 0.62 | 25 | “   | 56 | 37.7 | -10.7 | -    |
|                           | CO   | 0.45 | 43 | 351 | 20 | 1176 | 722 | 0   | 0.62 | 0  | “   | 90 | 44.7 | 0.0   | 5.6  |
|                           | MP05 | 0.45 | 43 | 351 | 20 | 1176 | 686 | 36  | 0.62 | 5  | “   | 90 | 48.5 | 8.6   | 7.9  |
|                           | MP10 | 0.45 | 43 | 351 | 20 | 1176 | 650 | 72  | 0.62 | 10 | “   | 90 | 51.4 | 14.9  | 10.0 |
|                           | MP15 | 0.45 | 43 | 351 | 20 | 1176 | 614 | 108 | 0.62 | 15 | “   | 90 | 48.4 | 8.3   | 11.7 |
|                           | MP20 | 0.45 | 43 | 351 | 20 | 1176 | 578 | 144 | 0.62 | 20 | “   | 90 | 42.0 | -6.1  | -    |
|                           | MP25 | 0.45 | 43 | 351 | 20 | 1176 | 542 | 181 | 0.62 | 25 | “   | 90 | 39.5 | -11.5 | -    |
| Vardhan<br>et al.<br>[22] | M0   | 0.50 | 43 | 372 | 20 | 1179 | 621 | 0   | 0.66 | 0  | Cu. | 7  | 24.8 | 0.0   | 0.3  |
|                           | M10  | 0.50 | 43 | 372 | 20 | 1179 | 559 | 69  | 0.65 | 10 | “   | 7  | 26.9 | 8.5   | 7.4  |
|                           | M20  | 0.50 | 43 | 372 | 20 | 1179 | 497 | 138 | 0.65 | 20 | “   | 7  | 27.8 | 12.1  | 13.2 |
|                           | M30  | 0.50 | 43 | 372 | 20 | 1179 | 435 | 207 | 0.65 | 30 | “   | 7  | 29.5 | 19.1  | 17.7 |
|                           | M40  | 0.50 | 43 | 372 | 20 | 1179 | 373 | 275 | 0.65 | 40 | “   | 7  | 30.5 | 23.0  | 20.8 |
|                           | M50  | 0.50 | 43 | 372 | 20 | 1179 | 311 | 344 | 0.64 | 50 | “   | 7  | 30.1 | 21.3  | 22.6 |
|                           | M60  | 0.50 | 43 | 372 | 20 | 1179 | 249 | 413 | 0.64 | 60 | “   | 7  | 29.5 | 19.1  | 23.1 |
|                           | M0   | 0.50 | 43 | 372 | 20 | 1179 | 621 | 0   | 0.66 | 0  | “   | 28 | 36.1 | 0.0   | 0.3  |
|                           | M10  | 0.50 | 43 | 372 | 20 | 1179 | 559 | 69  | 0.65 | 10 | “   | 28 | 39.6 | 9.5   | 7.4  |
|                           | M20  | 0.50 | 43 | 372 | 20 | 1179 | 497 | 138 | 0.65 | 20 | “   | 28 | 41.8 | 15.6  | 13.2 |
|                           | M30  | 0.50 | 43 | 372 | 20 | 1179 | 435 | 207 | 0.65 | 30 | “   | 28 | 43.7 | 20.9  | 17.7 |
|                           | M40  | 0.50 | 43 | 372 | 20 | 1179 | 373 | 275 | 0.65 | 40 | “   | 28 | 44.2 | 22.4  | 20.8 |
|                           | M50  | 0.50 | 43 | 372 | 20 | 1179 | 311 | 344 | 0.64 | 50 | “   | 28 | 43.8 | 21.2  | 22.6 |
|                           | M60  | 0.50 | 43 | 372 | 20 | 1179 | 249 | 413 | 0.64 | 60 | “   | 28 | 43.4 | 20.2  | 23.1 |
|                           | M0   | 0.50 | 43 | 372 | 20 | 1179 | 621 | 0   | 0.66 | 0  | “   | 90 | 44.5 | 0.0   | 0.3  |
|                           | M10  | 0.50 | 43 | 372 | 20 | 1179 | 559 | 69  | 0.65 | 10 | “   | 90 | 48.6 | 9.3   | 7.4  |
|                           | M20  | 0.50 | 43 | 372 | 20 | 1179 | 497 | 138 | 0.65 | 20 | “   | 90 | 50.4 | 13.2  | 13.2 |
|                           | M30  | 0.50 | 43 | 372 | 20 | 1179 | 435 | 207 | 0.65 | 30 | “   | 90 | 53.4 | 20.0  | 17.7 |
|                           | M40  | 0.50 | 43 | 372 | 20 | 1179 | 373 | 275 | 0.65 | 40 | “   | 90 | 54.7 | 22.9  | 20.8 |
|                           | M50  | 0.50 | 43 | 372 | 20 | 1179 | 311 | 344 | 0.64 | 50 | “   | 90 | 53.9 | 21.1  | 22.6 |
|                           | M60  | 0.50 | 43 | 372 | 20 | 1179 | 249 | 413 | 0.64 | 60 | “   | 90 | 53.1 | 19.4  | 23.1 |

|                                 |      |      |    |     |    |     |      |     |      |    |     |    |      |       |       |
|---------------------------------|------|------|----|-----|----|-----|------|-----|------|----|-----|----|------|-------|-------|
| Alyamaç<br>and<br>Aydın<br>[19] | REF  | 0.60 | 43 | 320 | 16 | 771 | 1077 | 0   | 0.42 | 0  | Cu. | 7  | 24.8 | 0.0   | -0.6  |
|                                 | MP10 | 0.60 | 43 | 320 | 16 | 771 | 969  | 108 | 0.42 | 10 | “   | 7  | 26.3 | 6.0   | 2.3   |
|                                 | MP20 | 0.60 | 43 | 320 | 16 | 771 | 861  | 216 | 0.42 | 20 | “   | 7  | 27.4 | 10.5  | 4.1   |
|                                 | MP30 | 0.60 | 43 | 320 | 16 | 771 | 753  | 324 | 0.42 | 30 | “   | 7  | 26.8 | 8.1   | 4.7   |
|                                 | MP40 | 0.60 | 43 | 320 | 16 | 771 | 645  | 432 | 0.42 | 40 | “   | 7  | 26.0 | 4.8   | 4.1   |
|                                 | MP50 | 0.60 | 43 | 320 | 16 | 771 | 537  | 540 | 0.42 | 50 | “   | 7  | 25.4 | 2.4   | 2.3   |
|                                 | MP90 | 0.60 | 43 | 320 | 16 | 771 | 105  | 972 | 0.42 | 90 | “   | 7  | 23.2 | -6.5  | -16.7 |
|                                 | REF  | 0.60 | 43 | 320 | 16 | 771 | 1077 | 0   | 0.42 | 0  | “   | 28 | 34.1 | 0.0   | -0.6  |
|                                 | MP10 | 0.60 | 43 | 320 | 16 | 771 | 969  | 108 | 0.42 | 10 | “   | 28 | 35.3 | 3.5   | 2.3   |
|                                 | MP20 | 0.60 | 43 | 320 | 16 | 771 | 861  | 216 | 0.42 | 20 | “   | 28 | 36.3 | 6.5   | 4.1   |
|                                 | MP30 | 0.60 | 43 | 320 | 16 | 771 | 753  | 324 | 0.42 | 30 | “   | 28 | 35.5 | 4.1   | 4.7   |
|                                 | MP40 | 0.60 | 43 | 320 | 16 | 771 | 645  | 432 | 0.42 | 40 | “   | 28 | 33.4 | -2.1  | 4.1   |
|                                 | MP50 | 0.60 | 43 | 320 | 16 | 771 | 537  | 540 | 0.42 | 50 | “   | 28 | 31.4 | -7.9  | 2.3   |
|                                 | MP90 | 0.60 | 43 | 320 | 16 | 771 | 105  | 972 | 0.42 | 90 | “   | 28 | 29.3 | -14.1 | -16.7 |
|                                 | REF  | 0.60 | 43 | 320 | 16 | 771 | 1077 | 0   | 0.42 | 0  | “   | 28 | 36.2 | 0.0   | -0.6  |
|                                 | MP10 | 0.60 | 43 | 320 | 16 | 771 | 969  | 108 | 0.42 | 10 | “   | 28 | 37.1 | 2.5   | 2.3   |
|                                 | MP20 | 0.60 | 43 | 320 | 16 | 771 | 861  | 216 | 0.42 | 20 | “   | 28 | 38.1 | 5.2   | 4.1   |
|                                 | MP30 | 0.60 | 43 | 320 | 16 | 771 | 753  | 324 | 0.42 | 30 | “   | 28 | 37.4 | 3.3   | 4.7   |
|                                 | MP40 | 0.60 | 43 | 320 | 16 | 771 | 645  | 432 | 0.42 | 40 | “   | 28 | 36.4 | 0.6   | 4.1   |
|                                 | MP50 | 0.60 | 43 | 320 | 16 | 771 | 537  | 540 | 0.42 | 50 | “   | 28 | 34.9 | -3.6  | 2.3   |
|                                 | MP90 | 0.60 | 43 | 320 | 16 | 771 | 105  | 972 | 0.42 | 90 | “   | 28 | 31.5 | -13.0 | -16.7 |
|                                 | REF  | 0.60 | 43 | 320 | 16 | 771 | 1077 | 0   | 0.42 | 0  | “   | 90 | 41.4 | 0.0   | -0.6  |
|                                 | MP10 | 0.60 | 43 | 320 | 16 | 771 | 969  | 108 | 0.42 | 10 | “   | 90 | 43.3 | 4.6   | 2.3   |
|                                 | MP20 | 0.60 | 43 | 320 | 16 | 771 | 861  | 216 | 0.42 | 20 | “   | 90 | 44.2 | 6.8   | 4.1   |
|                                 | MP30 | 0.60 | 43 | 320 | 16 | 771 | 753  | 324 | 0.42 | 30 | “   | 90 | 43.2 | 4.3   | 4.7   |
|                                 | MP40 | 0.60 | 43 | 320 | 16 | 771 | 645  | 432 | 0.42 | 40 | “   | 90 | 41.2 | -0.5  | 4.1   |
|                                 | MP50 | 0.60 | 43 | 320 | 16 | 771 | 537  | 540 | 0.42 | 50 | “   | 90 | 38.5 | -7.0  | 2.3   |
|                                 | MP90 | 0.60 | 43 | 320 | 16 | 771 | 105  | 972 | 0.42 | 90 | “   | 90 | 35.2 | -15.0 | -16.7 |

|                           |         |      |    |     |    |      |     |     |      |    |     |    |      |      |      |
|---------------------------|---------|------|----|-----|----|------|-----|-----|------|----|-----|----|------|------|------|
| Aliabdo<br>et al.<br>[15] | 0-0.5   | 0.40 | 43 | 400 | 19 | 1089 | 726 | 0   | 0.60 | 0  | Cu. | 7  | 41.8 | 0.0  | 3.7  |
|                           | 5-0.5   | 0.40 | 43 | 400 | 19 | 1088 | 689 | 36  | 0.60 | 5  | “   | 7  | 45.2 | 8.0  | 6.6  |
|                           | 7.5-0.5 | 0.40 | 43 | 400 | 19 | 1088 | 671 | 54  | 0.60 | 8  | “   | 7  | 45.8 | 9.4  | 8.0  |
|                           | 10-0.5  | 0.40 | 43 | 400 | 19 | 1087 | 652 | 72  | 0.60 | 10 | “   | 7  | 46.2 | 10.4 | 9.3  |
|                           | 15-0.5  | 0.40 | 43 | 400 | 19 | 1086 | 616 | 109 | 0.60 | 15 | “   | 7  | 45.5 | 8.8  | 11.7 |
|                           | 0-0.5   | 0.40 | 43 | 400 | 19 | 1028 | 686 | 0   | 0.60 | 0  | “   | 28 | 48.5 | 0.0  | 3.7  |
|                           | 5-0.5   | 0.40 | 43 | 400 | 19 | 1027 | 651 | 34  | 0.60 | 5  | “   | 28 | 57.0 | 17.6 | 6.6  |
|                           | 7.5-0.5 | 0.40 | 43 | 400 | 19 | 1027 | 633 | 51  | 0.60 | 8  | “   | 28 | 58.7 | 21.1 | -    |
|                           | 10-0.5  | 0.40 | 43 | 400 | 19 | 1026 | 616 | 68  | 0.60 | 10 | “   | 28 | 59.3 | 22.4 | -    |
|                           | 15-0.5  | 0.40 | 43 | 400 | 19 | 1025 | 581 | 103 | 0.60 | 15 | “   | 28 | 56.0 | 15.6 | 11.7 |
|                           | 0-0.5   | 0.40 | 43 | 400 | 19 | 1028 | 686 | 0   | 0.60 | 0  | “   | 56 | 55.6 | 0.0  | 3.7  |
|                           | 5-0.5   | 0.40 | 43 | 400 | 19 | 1027 | 651 | 34  | 0.60 | 5  | “   | 56 | 59.3 | 6.6  | 6.6  |
|                           | 7.5-0.5 | 0.40 | 43 | 400 | 19 | 1027 | 633 | 51  | 0.60 | 8  | “   | 56 | 62.0 | 11.4 | 8.0  |
|                           | 10-0.5  | 0.40 | 43 | 400 | 19 | 1026 | 616 | 68  | 0.60 | 10 | “   | 56 | 62.7 | 12.8 | 9.3  |
|                           | 15-0.5  | 0.40 | 43 | 400 | 19 | 1025 | 581 | 103 | 0.60 | 15 | “   | 56 | 61.0 | 9.8  | 11.7 |
|                           | 0-0.5   | 0.50 | 43 | 400 | 19 | 1028 | 686 | 0   | 0.60 | 0  | “   | 7  | 30.9 | 0.0  | 3.5  |
|                           | 5-0.5   | 0.50 | 43 | 400 | 19 | 1027 | 651 | 34  | 0.60 | 5  | “   | 7  | 33.7 | 9.1  | 7.4  |
|                           | 7.5-0.5 | 0.50 | 43 | 400 | 19 | 1027 | 633 | 51  | 0.60 | 8  | “   | 7  | 35.6 | 15.3 | 9.2  |
|                           | 10-0.5  | 0.50 | 43 | 400 | 19 | 1026 | 616 | 68  | 0.60 | 10 | “   | 7  | 36.3 | 17.4 | 10.9 |
|                           | 15-0.5  | 0.50 | 43 | 400 | 19 | 1025 | 581 | 103 | 0.60 | 15 | “   | 7  | 34.4 | 11.3 | 14.2 |
|                           | 0-0.5   | 0.50 | 43 | 400 | 19 | 1028 | 686 | 0   | 0.60 | 0  | “   | 28 | 40.0 | 0.0  | 3.5  |
|                           | 5-0.5   | 0.50 | 43 | 400 | 19 | 1027 | 651 | 34  | 0.60 | 5  | “   | 28 | 43.0 | 7.6  | 7.4  |
|                           | 7.5-0.5 | 0.50 | 43 | 400 | 19 | 1027 | 633 | 51  | 0.60 | 8  | “   | 28 | 44.6 | 11.5 | 9.2  |
|                           | 10-0.5  | 0.50 | 43 | 400 | 19 | 1026 | 616 | 68  | 0.60 | 10 | “   | 28 | 45.6 | 14.0 | 10.9 |
|                           | 15-0.5  | 0.50 | 43 | 400 | 19 | 1025 | 581 | 103 | 0.60 | 15 | “   | 28 | 43.1 | 7.9  | 14.2 |
|                           | 0-0.5   | 0.50 | 43 | 400 | 19 | 1028 | 686 | 0   | 0.60 | 0  | “   | 56 | 45.4 | 0.0  | 3.5  |
|                           | 5-0.5   | 0.50 | 43 | 400 | 19 | 1027 | 651 | 34  | 0.60 | 5  | “   | 56 | 46.7 | 3.0  | 7.4  |
|                           | 7.5-0.5 | 0.50 | 43 | 400 | 19 | 1027 | 633 | 51  | 0.60 | 8  | “   | 56 | 48.0 | 5.9  | 9.2  |
|                           | 10-0.5  | 0.50 | 43 | 400 | 19 | 1026 | 616 | 68  | 0.60 | 10 | “   | 56 | 48.8 | 7.7  | 10.9 |
|                           | 15-0.5  | 0.50 | 43 | 400 | 19 | 1025 | 581 | 103 | 0.60 | 15 | “   | 56 | 46.3 | 2.0  | -    |

|                          |       |      |    |     |    |      |     |     |      |    |     |    |      |      |      |
|--------------------------|-------|------|----|-----|----|------|-----|-----|------|----|-----|----|------|------|------|
| Ashish<br>et al.<br>[37] | MX0   | 0.42 | 43 | 432 | 20 | 1124 | 648 | 0   | 0.63 | 0  | Cu. | 7  | 21.2 | 0.0  | 4.6  |
|                          | MX1   | 0.42 | 43 | 432 | 20 | 1124 | 584 | 65  | 0.63 | 10 | “   | 7  | 23.5 | 10.8 | 12.0 |
|                          | MX3   | 0.42 | 43 | 432 | 20 | 1124 | 551 | 97  | 0.63 | 15 | “   | 7  | 26.7 | 26.1 | 15.3 |
|                          | MX0   | 0.42 | 43 | 432 | 20 | 1124 | 648 | 0   | 0.63 | 0  | “   | 28 | 32.8 | 0.0  | 4.6  |
|                          | MX1   | 0.42 | 43 | 432 | 20 | 1124 | 584 | 65  | 0.63 | 10 | “   | 28 | 36.5 | 11.2 | 12.0 |
|                          | MX3   | 0.42 | 43 | 432 | 20 | 1124 | 551 | 97  | 0.63 | 15 | “   | 28 | 40.5 | 23.2 | 15.3 |
|                          | MX0   | 0.42 | 43 | 432 | 20 | 1124 | 648 | 0   | 0.63 | 0  | “   | 90 | 50.5 | 0.0  | 4.6  |
|                          | MX1   | 0.42 | 43 | 432 | 20 | 1124 | 584 | 65  | 0.63 | 10 | “   | 90 | 58.4 | 15.6 | 12.0 |
|                          | MX3   | 0.42 | 43 | 432 | 20 | 1124 | 551 | 97  | 0.63 | 15 | “   | 90 | 58.7 | 16.2 | 15.3 |
| Sadek<br>et al.<br>[18]  | C1    | 0.45 | 43 | 400 | 14 | 900  | 900 | 0   | 0.50 | 0  | Cu. | 7  | 27.9 | 0.0  | -5.8 |
|                          | 20%MP | 0.45 | 43 | 400 | 14 | 862  | 862 | 80  | 0.48 | 20 | “   | 7  | 28.1 | 0.9  | 5.4  |
|                          | 30%MP | 0.45 | 43 | 400 | 14 | 843  | 843 | 120 | 0.47 | 30 | “   | 7  | 29.2 | 5.0  | 8.2  |
|                          | 40%MP | 0.45 | 43 | 400 | 14 | 824  | 824 | 160 | 0.46 | 40 | “   | 7  | 31.0 | 11.2 | 9.0  |
|                          | 50%MP | 0.45 | 43 | 400 | 14 | 806  | 806 | 200 | 0.44 | 50 | “   | 7  | 32.6 | 17.2 | 7.9  |
|                          | C1    | 0.45 | 43 | 400 | 14 | 900  | 900 | 0   | 0.50 | 0  | “   | 28 | 36.0 | 0.0  | -5.8 |
|                          | 20%MP | 0.45 | 43 | 400 | 14 | 862  | 862 | 80  | 0.48 | 20 | “   | 28 | 35.5 | -1.3 | 5.4  |
|                          | 30%MP | 0.45 | 43 | 400 | 14 | 843  | 843 | 120 | 0.47 | 30 | “   | 28 | 36.7 | 1.9  | 8.2  |
|                          | 40%MP | 0.45 | 43 | 400 | 14 | 824  | 824 | 160 | 0.46 | 40 | “   | 28 | 37.5 | 4.2  | 9.0  |
|                          | 50%MP | 0.45 | 43 | 400 | 14 | 806  | 806 | 200 | 0.44 | 50 | “   | 28 | 39.4 | 9.3  | 7.9  |
| Demirel<br>[38]          | MD0   | 0.51 | 43 | 500 | 16 | 725  | 836 | 0   | 0.46 | 0  | Cu. | 7  | 35.5 | 0.0  | -3.4 |
|                          | MD25  | 0.51 | 43 | 500 | 16 | 725  | 797 | 39  | 0.46 | 5  | “   | 7  | 35.5 | 0.1  | 1.4  |
|                          | MD50  | 0.51 | 43 | 500 | 16 | 725  | 758 | 78  | 0.46 | 9  | “   | 7  | 36.4 | 2.6  | 5.8  |
|                          | MD100 | 0.51 | 43 | 500 | 16 | 725  | 680 | 156 | 0.46 | 19 | “   | 7  | 39.0 | 9.8  | 14.1 |
|                          | MD0   | 0.51 | 43 | 500 | 16 | 725  | 836 | 0   | 0.46 | 0  | “   | 28 | 46.7 | 0.0  | -3.4 |
|                          | MD25  | 0.51 | 43 | 500 | 16 | 725  | 797 | 39  | 0.46 | 5  | “   | 28 | 50.3 | 7.6  | 1.4  |
|                          | MD50  | 0.51 | 43 | 500 | 16 | 725  | 758 | 78  | 0.46 | 9  | “   | 28 | 50.7 | 8.6  | 5.8  |
|                          | MD100 | 0.51 | 43 | 500 | 16 | 725  | 680 | 156 | 0.46 | 19 | “   | 28 | 53.4 | 14.4 | 14.1 |
|                          | MD0   | 0.51 | 43 | 500 | 16 | 725  | 836 | 0   | 0.46 | 0  | “   | 90 | 60.5 | 0.0  | -3.4 |
|                          | MD25  | 0.51 | 43 | 500 | 16 | 725  | 797 | 39  | 0.46 | 5  | “   | 90 | 61.4 | 1.5  | 1.4  |
|                          | MD50  | 0.51 | 43 | 500 | 16 | 725  | 758 | 78  | 0.46 | 9  | “   | 90 | 61.5 | 1.6  | 5.8  |
|                          | MD100 | 0.51 | 43 | 500 | 16 | 725  | 680 | 156 | 0.46 | 19 | “   | 90 | 63.3 | 4.6  | 14.1 |

|                            |                |      |      |     |    |      |      |     |      |     |      |    |      |       |       |
|----------------------------|----------------|------|------|-----|----|------|------|-----|------|-----|------|----|------|-------|-------|
| Yıldız<br>et al.<br>[39]   | D300-K         | 0.60 | 43   | 300 | 8  | 598  | 1110 | 0   | 0.35 | 0   | Cu.  | 28 | 36.9 | 0.0   | -     |
|                            | D300-CE0-MT25  | 0.60 | 43   | 300 | 8  | 598  | 1089 | 21  | 0.35 | 2   | “    | 28 | 42.3 | 14.5  | 18.9  |
|                            | D300-CE0-MT50  | 0.60 | 43   | 300 | 8  | 598  | 1068 | 43  | 0.35 | 4   | “    | 28 | 44.2 | 19.8  | 20.3  |
|                            | D300-CE0-MT75  | 0.60 | 43   | 300 | 8  | 598  | 1046 | 64  | 0.35 | 6   | “    | 28 | 45.9 | 24.2  | 21.5  |
|                            | D300-CE0-MT100 | 0.60 | 43   | 300 | 8  | 598  | 1025 | 85  | 0.35 | 8   | “    | 28 | 44.6 | 20.7  | 22.8  |
|                            | D350-K         | 0.60 | 43   | 350 | 8  | 556  | 1032 | 0   | 0.35 | 0   | “    | 28 | 49.9 | 0.0   | 8.3   |
|                            | D350-CE0-MT25  | 0.60 | 43   | 350 | 8  | 556  | 1013 | 20  | 0.35 | 2   | “    | 28 | 54.8 | 9.9   | 10.0  |
|                            | D350-CE0-MT50  | 0.60 | 43   | 350 | 8  | 556  | 993  | 40  | 0.35 | 4   | “    | 28 | 57.9 | 16.1  | 11.7  |
|                            | D350-CE0-MT75  | 0.60 | 43   | 350 | 8  | 556  | 973  | 60  | 0.35 | 6   | “    | 28 | 59.6 | 19.4  | 13.3  |
|                            | D350-CE0-MT100 | 0.60 | 43   | 350 | 8  | 556  | 953  | 79  | 0.35 | 8   | “    | 28 | 58.5 | 17.2  | 15.0  |
| Boobalan<br>et al.<br>[40] | M25-0% WMD     | 0.43 | 53   | 320 | 20 | 1356 | 751  | 0   | 0.64 | 0   | “    | 7  | 21.3 | 0.0   | 2.7   |
|                            | M25-25% WMD    | 0.43 | 53   | 320 | 20 | 1356 | 564  | 187 | 0.64 | 25  | Cu.  | 7  | 22.2 | 4.2   | 5.8   |
|                            | M25-50% WMD    | 0.43 | 53   | 320 | 20 | 1356 | 376  | 375 | 0.64 | 50  | “    | 7  | 22.4 | 5.2   | 1.5   |
|                            | M25-75% WMD    | 0.43 | 53   | 320 | 20 | 1356 | 188  | 563 | 0.64 | 75  | “    | 7  | 21.2 | -0.8  | -10.2 |
|                            | M25-100% WMD   | 0.43 | 53   | 320 | 20 | 1356 | 0    | 751 | 0.64 | 100 | “    | 7  | 13.3 | -37.5 | -29.4 |
|                            | M25-0% WMD     | 0.43 | 53   | 320 | 20 | 1356 | 751  | 0   | 0.64 | 0   | “    | 14 | 21.8 | 0.0   | 2.7   |
|                            | M25-25% WMD    | 0.43 | 53   | 320 | 20 | 1356 | 564  | 187 | 0.64 | 25  | “    | 14 | 22.4 | 2.7   | 5.8   |
|                            | M25-50% WMD    | 0.43 | 53   | 320 | 20 | 1356 | 376  | 375 | 0.64 | 50  | “    | 14 | 23.1 | 6.1   | 1.5   |
|                            | M25-75% WMD    | 0.43 | 53   | 320 | 20 | 1356 | 188  | 563 | 0.64 | 75  | “    | 14 | 21.2 | -2.7  | -10.2 |
|                            | M25-100% WMD   | 0.43 | 53   | 320 | 20 | 1356 | 0    | 751 | 0.64 | 100 | “    | 14 | 14.2 | -34.7 | -29.4 |
|                            | M25-0% WMD     | 0.43 | 53   | 320 | 20 | 1356 | 751  | 0   | 0.64 | 0   | “    | 28 | 31.7 | 0.0   | 2.7   |
|                            | M25-25% WMD    | 0.43 | 53   | 320 | 20 | 1356 | 564  | 187 | 0.64 | 25  | “    | 28 | 33.1 | 4.3   | 5.8   |
|                            | M25-50% WMD    | 0.43 | 53   | 320 | 20 | 1356 | 376  | 375 | 0.64 | 50  | “    | 28 | 34.7 | 9.3   | 1.5   |
|                            | M25-75% WMD    | 0.43 | 53   | 320 | 20 | 1356 | 188  | 563 | 0.64 | 75  | “    | 28 | 26.3 | -17.1 | -10.2 |
|                            | M25-100% WMD   | 0.43 | 53   | 320 | 20 | 1356 | 0    | 751 | 0.64 | 100 | “    | 28 | 21.3 | -32.8 | -29.4 |
| Ghani<br>et al.<br>[24]    | SR-0           | 0.43 | 0.62 | 354 | 9  | 993  | 821  | 0   | 0.55 | 0   | Cyl. | 14 | 30.5 | 0.0   | -     |
|                            | SR-20          | 0.43 | 0.62 | 354 | 9  | 993  | 656  | 164 | 0.55 | 20  | “    | 14 | 36.9 | 20.9  | -     |
|                            | SR-40          | 0.43 | 0.62 | 354 | 9  | 993  | 492  | 328 | 0.55 | 40  | “    | 14 | 42.5 | 39.4  | -     |
|                            | SR-60          | 0.43 | 0.62 | 354 | 9  | 993  | 328  | 492 | 0.55 | 60  | “    | 14 | 38.7 | 26.8  | -     |

|       |      |      |     |   |     |     |     |      |    |   |    |      |       |   |
|-------|------|------|-----|---|-----|-----|-----|------|----|---|----|------|-------|---|
| SR-80 | 0.43 | 0.62 | 354 | 9 | 993 | 164 | 656 | 0.55 | 80 | “ | 14 | 18.5 | -39.5 | - |
| SR-0  | 0.43 | 0.62 | 354 | 9 | 993 | 821 | 0   | 0.55 | 0  | “ | 28 | 33.6 | 0.0   | - |
| SR-20 | 0.43 | 0.62 | 354 | 9 | 993 | 656 | 164 | 0.55 | 20 | “ | 28 | 41.2 | 22.6  | - |
| SR-40 | 0.43 | 0.62 | 354 | 9 | 993 | 492 | 328 | 0.55 | 40 | “ | 28 | 46.4 | 38.1  | - |
| SR-60 | 0.43 | 0.62 | 354 | 9 | 993 | 328 | 492 | 0.55 | 60 | “ | 28 | 41.9 | 24.8  | - |
| SR-80 | 0.43 | 0.62 | 354 | 9 | 993 | 164 | 656 | 0.55 | 80 | “ | 28 | 19.7 | -41.5 | - |
| SR-0  | 0.43 | 0.62 | 354 | 9 | 993 | 821 | 0   | 0.55 | 0  | “ | 70 | 33.9 | 0.0   | - |
| SR-20 | 0.43 | 0.62 | 354 | 9 | 993 | 656 | 164 | 0.55 | 20 | “ | 70 | 45.5 | 34.0  | - |
| SR-40 | 0.43 | 0.62 | 354 | 9 | 993 | 492 | 328 | 0.55 | 40 | “ | 70 | 49.2 | 44.9  | - |
| SR-60 | 0.43 | 0.62 | 354 | 9 | 993 | 328 | 492 | 0.55 | 60 | “ | 70 | 45.4 | 33.9  | - |
| SR-80 | 0.43 | 0.62 | 354 | 9 | 993 | 164 | 656 | 0.55 | 80 | “ | 70 | 22.4 | -34.0 | - |



**Table S2.** Database of compressive strength tests of concretes containing fine marble aggregate

| Reference                      | Sample No | W/C  | Cem. Grade (MPa) | Cement (kg/m <sup>3</sup> ) | Max. Agg. Size (mm) | Coarse A. (kg/m <sup>3</sup> ) | Fine A. (kg/m <sup>3</sup> ) | Fine Marble (kg/m <sup>3</sup> ) | R    | M (%) | Sample | Curing Day | Con. Cu. Comp Str. (MPa) | Con. Exp. Inc. Str. (%) | Est. Inc. Str. (%) |
|--------------------------------|-----------|------|------------------|-----------------------------|---------------------|--------------------------------|------------------------------|----------------------------------|------|-------|--------|------------|--------------------------|-------------------------|--------------------|
| Binici and Aksogan [28]        | Control   | 0.53 | 43               | 400                         | 32                  | 1200                           | 500                          | 0                                | 0.71 | 0     | Cu.    | 7          | 19.8                     | 0.0                     | 4.0                |
|                                | MP10      | 0.53 | 43               | 400                         | 32                  | 1200                           | 450                          | 50                               | 0.73 | 10    | “      | 7          | 23.5                     | 18.7                    | 13.9               |
|                                | MP20      | 0.54 | 43               | 400                         | 32                  | 1200                           | 400                          | 100                              | 0.75 | 20    | “      | 7          | 24.7                     | 24.7                    | 19.2               |
|                                | MP30      | 0.55 | 43               | 400                         | 32                  | 1200                           | 350                          | 150                              | 0.77 | 30    | “      | 7          | 25.3                     | 27.8                    | 24.0               |
|                                | MP40      | 0.56 | 43               | 400                         | 32                  | 1200                           | 300                          | 200                              | 0.80 | 40    | “      | 7          | 26.0                     | 31.3                    | 28.3               |
|                                | MP50      | 0.58 | 43               | 400                         | 32                  | 1200                           | 250                          | 250                              | 0.83 | 50    | “      | 7          | 27.1                     | 36.9                    | 32.0               |
|                                | MP100     | 0.59 | 43               | 400                         | 32                  | 1200                           | 0                            | 500                              | 1.00 | 100   | “      | 7          | 32.7                     | 65.2                    | 57.6               |
|                                | Control   | 0.53 | 43               | 400                         | 32                  | 1200                           | 500                          | 0                                | 0.71 | 0     | “      | 28         | 28.5                     | 0.0                     | 4.0                |
|                                | MP10      | 0.53 | 43               | 400                         | 32                  | 1200                           | 450                          | 50                               | 0.73 | 10    | “      | 28         | 33.6                     | 17.9                    | 13.9               |
|                                | MP20      | 0.54 | 43               | 400                         | 32                  | 1200                           | 400                          | 100                              | 0.75 | 20    | “      | 28         | 34.8                     | 22.1                    | 19.2               |
|                                | MP30      | 0.55 | 43               | 400                         | 32                  | 1200                           | 350                          | 150                              | 0.77 | 30    | “      | 28         | 35.6                     | 24.9                    | 24.0               |
|                                | MP40      | 0.56 | 43               | 400                         | 32                  | 1200                           | 300                          | 200                              | 0.80 | 40    | “      | 28         | 36.4                     | 27.7                    | 28.3               |
|                                | MP50      | 0.58 | 43               | 400                         | 32                  | 1200                           | 250                          | 250                              | 0.83 | 50    | “      | 28         | 37.8                     | 32.6                    | 32.0               |
|                                | MP100     | 0.59 | 43               | 400                         | 32                  | 1200                           | 0                            | 500                              | 1.00 | 100   | “      | 28         | 42.0                     | 47.4                    | 57.6               |
|                                | Control   | 0.53 | 43               | 400                         | 32                  | 1200                           | 500                          | 0                                | 0.71 | 0     | “      | 90         | 35.5                     | 0.0                     | 4.0                |
|                                | MP10      | 0.53 | 43               | 400                         | 32                  | 1200                           | 450                          | 50                               | 0.73 | 10    | “      | 90         | 39.6                     | 11.5                    | 13.9               |
|                                | MP20      | 0.54 | 43               | 400                         | 32                  | 1200                           | 400                          | 100                              | 0.75 | 20    | “      | 90         | 40.4                     | 13.8                    | 19.2               |
|                                | MP30      | 0.55 | 43               | 400                         | 32                  | 1200                           | 350                          | 150                              | 0.77 | 30    | “      | 90         | 41.6                     | 17.2                    | 24.0               |
|                                | MP40      | 0.56 | 43               | 400                         | 32                  | 1200                           | 300                          | 200                              | 0.80 | 40    | “      | 90         | 42.5                     | 19.7                    | 28.3               |
|                                | MP50      | 0.58 | 43               | 400                         | 32                  | 1200                           | 250                          | 250                              | 0.83 | 50    | “      | 90         | 43.0                     | 21.1                    | -                  |
|                                | MP100     | 0.59 | 43               | 400                         | 32                  | 1200                           | 0                            | 500                              | 1.00 | 100   | “      | 90         | 47.5                     | 33.8                    | -                  |
| Ahmad et al. [23] <sup>1</sup> | Control   | 0.50 | 43               | 408                         | 20                  | 1225                           | 613                          | 0                                | 0.67 | 0     | Cyl.   | 7          | 18.9                     | 0.0                     | 1.0                |
|                                | M20       | 0.50 | 43               | 408                         | 20                  | 1225                           | 490                          | 123                              | 0.71 | 20    | “      | 7          | 19.4                     | 3.1                     | 6.6                |
|                                | M40       | 0.50 | 43               | 408                         | 20                  | 1225                           | 368                          | 245                              | 0.77 | 40    | “      | 7          | 20.1                     | 6.5                     | 10.5               |
|                                | M60       | 0.50 | 43               | 408                         | 20                  | 1225                           | 245                          | 368                              | 0.83 | 60    | “      | 7          | 21.3                     | 13.1                    | 12.2               |

|                                        |         |      |    |     |    |      |     |     |      |     |      |    |      |       |       |
|----------------------------------------|---------|------|----|-----|----|------|-----|-----|------|-----|------|----|------|-------|-------|
|                                        | M80     | 0.50 | 43 | 408 | 20 | 1225 | 123 | 490 | 0.91 | 80  | “    | 7  | 20.8 | 10.5  | 11.1  |
|                                        | M100    | 0.50 | 43 | 408 | 20 | 1225 | 0   | 613 | 1.00 | 100 | “    | 7  | 19.9 | 5.7   | 6.3   |
|                                        | Control | 0.50 | 43 | 408 | 20 | 1225 | 613 | 0   | 0.67 | 0   | “    | 28 | 27.3 | 0.0   | 1.0   |
|                                        | M20     | 0.50 | 43 | 408 | 20 | 1225 | 490 | 123 | 0.71 | 20  | “    | 28 | 29.9 | 9.7   | 6.6   |
|                                        | M40     | 0.50 | 43 | 408 | 20 | 1225 | 368 | 245 | 0.77 | 40  | “    | 28 | 31.4 | 15.2  | 10.5  |
|                                        | M60     | 0.50 | 43 | 408 | 20 | 1225 | 245 | 368 | 0.83 | 60  | “    | 28 | 33.0 | 20.9  | 12.2  |
|                                        | M80     | 0.50 | 43 | 408 | 20 | 1225 | 123 | 490 | 0.91 | 80  | “    | 28 | 30.3 | 10.9  | 11.1  |
|                                        | M100    | 0.50 | 43 | 408 | 20 | 1225 | 0   | 613 | 1.00 | 100 | “    | 28 | 29.3 | 7.3   | 6.3   |
|                                        | Control | 0.50 | 43 | 408 | 20 | 1225 | 613 | 0   | 0.67 | 0   | “    | 56 | 30.8 | 0.0   | 1.0   |
|                                        | M20     | 0.50 | 43 | 408 | 20 | 1225 | 490 | 123 | 0.71 | 20  | “    | 56 | 32.1 | 4.3   | 6.6   |
|                                        | M40     | 0.50 | 43 | 408 | 20 | 1225 | 368 | 245 | 0.77 | 40  | “    | 56 | 32.5 | 5.7   | 10.5  |
|                                        | M60     | 0.50 | 43 | 408 | 20 | 1225 | 245 | 368 | 0.83 | 60  | “    | 56 | 35.4 | 15.1  | 12.2  |
|                                        | M80     | 0.50 | 43 | 408 | 20 | 1225 | 123 | 490 | 0.91 | 80  | “    | 56 | 32.7 | 6.5   | 11.1  |
|                                        | M100    | 0.50 | 43 | 408 | 20 | 1225 | 0   | 613 | 1.00 | 100 | “    | 56 | 31.3 | 1.6   | 6.3   |
| Singhal<br>et al.<br>[41] <sup>2</sup> | Control | 0.37 | 43 | 422 | 20 | 1083 | 770 | 0   | 0.58 | 0   | Cu.  | 7  | 39.7 | 0.0   | 3.1   |
|                                        | F30M10  | 0.38 | 43 | 422 | 20 | 1083 | 693 | 77  | 0.61 | 10  | “    | 7  | 41.5 | 4.4   | 4.5   |
|                                        | F30M20  | 0.39 | 43 | 422 | 20 | 1083 | 616 | 154 | 0.64 | 20  | “    | 7  | 43.6 | 9.7   | 5.5   |
|                                        | F30M30  | 0.40 | 43 | 422 | 20 | 1083 | 539 | 231 | 0.67 | 30  | “    | 7  | 40.4 | 1.8   | 6.3   |
|                                        | Control | 0.37 | 43 | 422 | 20 | 1083 | 770 | 0   | 0.58 | 0   | “    | 28 | 47.2 | 0.0   | 3.1   |
|                                        | F30M10  | 0.38 | 43 | 422 | 20 | 1083 | 693 | 77  | 0.61 | 10  | “    | 28 | 49.7 | 5.3   | 4.5   |
|                                        | F30M20  | 0.39 | 43 | 422 | 20 | 1083 | 616 | 154 | 0.64 | 20  | “    | 28 | 52.3 | 10.9  | 5.5   |
|                                        | F30M30  | 0.40 | 43 | 422 | 20 | 1083 | 539 | 231 | 0.67 | 30  | “    | 28 | 48.2 | 2.2   | 6.3   |
| Hebhoub<br>et al.<br>[42] <sup>3</sup> | 0       | 0.50 | 43 | 350 | 25 | 1155 | 770 | 0   | 0.60 | 0   | Cyl. | 14 | 30.3 | 0.0   | -0.4  |
|                                        | 25      | 0.50 | 43 | 350 | 25 | 1155 | 578 | 193 | 0.67 | 25  | “    | 14 | 40.6 | 34.2  | -     |
|                                        | 50      | 0.50 | 43 | 350 | 25 | 1155 | 385 | 385 | 0.75 | 50  | “    | 14 | 38.3 | 26.4  | 26.7  |
|                                        | 75      | 0.50 | 43 | 350 | 25 | 1155 | 193 | 578 | 0.86 | 75  | “    | 14 | 35.5 | 17.2  | 17.9  |
|                                        | 100     | 0.50 | 43 | 350 | 25 | 1155 | 0   | 770 | 1.00 | 100 | “    | 14 | 23.7 | -21.5 | -15.7 |
|                                        | 0       | 0.50 | 43 | 350 | 25 | 1155 | 770 | 0   | 0.60 | 0   | “    | 28 | 34.6 | 0.0   | -0.4  |
|                                        | 25      | 0.50 | 43 | 350 | 25 | 1155 | 578 | 193 | 0.67 | 25  | “    | 28 | 40.6 | 17.4  | 18.9  |

|                         |        |      |    |     |    |      |     |     |       |     |     |    |      |       |       |
|-------------------------|--------|------|----|-----|----|------|-----|-----|-------|-----|-----|----|------|-------|-------|
| Silva<br>et al.<br>[21] | 50     | 0.50 | 43 | 350 | 25 | 1155 | 385 | 385 | 0.75  | 50  | “   | 28 | 42.9 | 24.2  | 26.7  |
|                         | 75     | 0.50 | 43 | 350 | 25 | 1155 | 193 | 578 | 0.86  | 75  | “   | 28 | 40.3 | 16.5  | 17.9  |
|                         | 100    | 0.50 | 43 | 350 | 25 | 1155 | 0   | 770 | 1.00  | 100 | “   | 28 | 26.8 | -22.5 | -15.7 |
|                         | 0      | 0.50 | 43 | 350 | 25 | 1155 | 770 | 0   | 0.60  | 0   | “   | 90 | 34.9 | 0.0   | -0.4  |
|                         | 25     | 0.50 | 43 | 350 | 25 | 1155 | 578 | 193 | 0.67  | 25  | “   | 90 | 40.6 | 16.4  | 18.9  |
|                         | 50     | 0.50 | 43 | 350 | 25 | 1155 | 385 | 385 | 0.75  | 50  | “   | 90 | 43.2 | 24.0  | 26.7  |
|                         | 75     | 0.5  | 43 | 350 | 25 | 1155 | 193 | 578 | 0.86  | 75  | “   | 90 | 43.2 | 24.0  | 17.9  |
|                         | 100    | 0.5  | 43 | 350 | 25 | 1155 | 0   | 770 | 1.00  | 100 | “   | 90 | 33.7 | -3.4  | -15.7 |
|                         | BRB    | 0.55 | 43 | 441 | 16 | 962  | 872 | 0   | 0.52  | 0   | Cu. | 7  | 38.1 | 0.0   | -0.5  |
|                         | BB/M20 | 0.55 | 43 | 441 | 16 | 962  | 698 | 174 | 0.58  | 20  | “   | 7  | 35.8 | -6.0  | -2.9  |
|                         | BB/M50 | 0.56 | 43 | 441 | 16 | 962  | 436 | 436 | 0.69  | 50  | “   | 7  | 35.6 | -6.6  | -5.7  |
|                         | BRM    | 0.54 | 43 | 441 | 16 | 962  | 0   | 872 | 1.00  | 100 | “   | 7  | 36.8 | -3.4  | -10.0 |
|                         | BRC    | 0.49 | 43 | 441 | 16 | 1219 | 554 | 0   | 0.69  | 0   | “   | 7  | 45.6 | 0.0   | -0.6  |
|                         | BC/N20 | 0.5  | 43 | 441 | 16 | 1219 | 443 | 111 | 0.73  | 20  | “   | 7  | 42.7 | -6.4  | -2.7  |
|                         | BC/M50 | 0.5  | 43 | 441 | 16 | 1219 | 277 | 277 | 0.81  | 50  | “   | 7  | 40.1 | -12.1 | -6.3  |
|                         | BRG    | 0.54 | 43 | 441 | 16 | 1069 | 695 | 0   | 0.61  | 0   | “   | 7  | 39.6 | 0.0   | 0.3   |
|                         | BG/M20 | 0.55 | 43 | 441 | 16 | 1069 | 481 | 214 | 0.69  | 20  | “   | 7  | 38.6 | -2.5  | -1.3  |
|                         | BG/M50 | 0.56 | 43 | 441 | 16 | 1069 | 160 | 535 | 0.87  | 50  | “   | 7  | 38.3 | -3.3  | -3.2  |
|                         | BRB    | 0.55 | 43 | 441 | 16 | 962  | 872 | 0   | 0.52  | 0   | “   | 28 | 50.4 | 0.0   | -0.5  |
|                         | BB/M20 | 0.55 | 43 | 441 | 16 | 962  | 698 | 174 | 0.58  | 20  | “   | 28 | 49.2 | -2.4  | -2.9  |
|                         | BB/M50 | 0.56 | 43 | 441 | 16 | 962  | 436 | 436 | 0.69  | 50  | “   | 28 | 46.7 | -7.3  | -5.7  |
|                         | BRM    | 0.54 | 43 | 441 | 16 | 962  | 0   | 872 | 1.00  | 100 | “   | 28 | 45.3 | -10.1 | -10.0 |
|                         | BRC    | 0.49 | 43 | 441 | 16 | 1219 | 554 | 0   | 0.69  | 0   | “   | 28 | 56.9 | 1.6   | -0.6  |
|                         | BC/N20 | 0.5  | 43 | 441 | 16 | 1219 | 443 | 111 | 0.737 | 20  | “   | 28 | 56.0 | 0.0   | -2.7  |
|                         | BC/M50 | 0.5  | 43 | 441 | 16 | 1219 | 277 | 277 | 0.81  | 50  | “   | 28 | 51.2 | -8.6  | -6.3  |
|                         | BRG    | 0.54 | 43 | 441 | 16 | 1069 | 695 | 0   | 0.61  | 0   | “   | 28 | 49.2 | 0.0   | 0.3   |
|                         | BG/M20 | 0.55 | 43 | 441 | 16 | 1069 | 481 | 214 | 0.69  | 20  | “   | 28 | 47.6 | -3.3  | -1.3  |
|                         | BG/M50 | 0.56 | 43 | 441 | 16 | 1069 | 160 | 535 | 0.87  | 50  | “   | 28 | 46.2 | -6.1  | -3.2  |

<sup>1</sup>The weights were calculated according to the 2450 kg/m<sup>3</sup> concrete mass according to the ratios given in the article.

<sup>2</sup>Concrete compressive strengths were increased according to the concrete compressive strength ratio between the control sample and the concrete with fly ash mineral additives.

<sup>3</sup>Aggregate weights were calculated according to the ratio of Fine Aggregate/Aggregate=0.4.

**Table S3.** Database of compressive strength tests of concretes containing coarse marble aggregate

| Reference           | Sample No | W/C  | Cem. Grade (MPa) | Cement (kg/m <sup>3</sup> ) | Max. Agg. Size (mm) | Coarse A. (kg/m <sup>3</sup> ) | Fine A. (kg/m <sup>3</sup> ) | Coarse Marble (kg/m <sup>3</sup> ) | R    | M (%) | Sample | Curing Day | Con. Cu. Comp Str. (MPa) | Con. Exp. Inc. Str. (%) | Est. Inc. Str. (%) |
|---------------------|-----------|------|------------------|-----------------------------|---------------------|--------------------------------|------------------------------|------------------------------------|------|-------|--------|------------|--------------------------|-------------------------|--------------------|
| Chawla et al. [43]  | A1        | 0.87 |                  | 240                         | 10                  | 1390                           | 1044                         | 0                                  | 0.57 | 0     | Cu.    | 7          | 5.1                      | 0.0                     | -2.8               |
|                     | A2        | 0.87 |                  | 240                         | 10                  | 0                              | 1044                         | 1421                               | 0.58 | 100   | “      | 7          | 5.4                      | 4.9                     | 8.3                |
|                     | A1        | 0.87 |                  | 240                         | 10                  | 1390                           | 1044                         | 0                                  | 0.57 | 0     | “      | 28         | 9.1                      | 0.0                     | -2.8               |
|                     | A2        | 0.87 |                  | 240                         | 10                  | 0                              | 1044                         | 1421                               | 0.58 | 100   | “      | 28         | 9.8                      | 7.1                     | 8.3                |
| Kore and Vyas [44]  | C0        | 0.62 | 33               | 310                         | 20                  | 1171                           | 647                          | 0                                  | 0.64 | 0     | Cu.    | 28         | 15.8                     | 0.0                     | 0.2                |
|                     | C1        | 0.62 | 33               | 310                         | 20                  | 964                            | 647                          | 234                                | 0.65 | 20    | “      | 28         | 16.0                     | 1.3                     | 9.8                |
|                     | C2        | 0.62 | 33               | 310                         | 20                  | 703                            | 647                          | 468                                | 0.64 | 40    | “      | 28         | 17.6                     | 11.6                    | 13.4               |
|                     | C3        | 0.62 | 33               | 310                         | 20                  | 468                            | 647                          | 703                                | 0.64 | 60    | “      | 28         | 18.7                     | 18.3                    | 17.6               |
|                     | C4        | 0.62 | 33               | 310                         | 20                  | 234                            | 647                          | 937                                | 0.64 | 80    | “      | 28         | 21.3                     | 35.0                    | 20.1               |
|                     | C5        | 0.62 | 33               | 310                         | 20                  | 0                              | 647                          | 1171                               | 0.64 | 100   | “      | 28         | 20.0                     | 26.5                    | 20.9               |
|                     | C0        | 0.62 | 33               | 310                         | 20                  | 1171                           | 647                          | 0                                  | 0.64 | 0     | “      | 90         | 21.0                     | 0.0                     | 0.2                |
|                     | C1        | 0.62 | 33               | 310                         | 20                  | 964                            | 647                          | 234                                | 0.65 | 20    | “      | 90         | 22.5                     | 7.1                     | 9.8                |
|                     | C2        | 0.62 | 33               | 310                         | 20                  | 703                            | 647                          | 468                                | 0.64 | 40    | “      | 90         | 24.4                     | 16.1                    | 13.4               |
|                     | C3        | 0.62 | 33               | 310                         | 20                  | 468                            | 647                          | 703                                | 0.64 | 60    | “      | 90         | 25.1                     | 19.4                    | 17.6               |
|                     | C4        | 0.62 | 33               | 310                         | 20                  | 234                            | 647                          | 937                                | 0.64 | 80    | “      | 90         | 24.5                     | 16.7                    | 20.1               |
|                     | C5        | 0.62 | 33               | 310                         | 20                  | 0                              | 647                          | 1171                               | 0.64 | 100   | “      | 90         | 24.7                     | 17.5                    | 20.9               |
| Martins et al. [45] | LRC       | 0.55 | 43               | 350                         | 22                  | 1003                           | 834                          | 0                                  | 0.55 | 0     | Cyl.   | 7          | 42.2                     | 0.0                     | 1.1                |
|                     | LC20      | 0.55 | 43               | 350                         | 22                  | 802                            | 794                          | 205                                | 0.56 | 20    | “      | 7          | 42.2                     | 0.0                     | 0.6                |
|                     | LC50      | 0.55 | 43               | 350                         | 22                  | 501                            | 794                          | 512                                | 0.56 | 50    | “      | 7          | 42.2                     | 0.0                     | 1.3                |
|                     | MRC       | 0.55 | 43               | 350                         | 22                  | 0                              | 794                          | 1023                               | 0.56 | 100   | “      | 7          | 41.0                     | -2.9                    | -5.5               |
|                     | BRC       | 0.55 | 43               | 350                         | 22                  | 1131                           | 834                          | 0                                  | 0.58 | 0     | “      | 7          | 42.2                     | 0.0                     | -4.3               |
|                     | BC20      | 0.55 | 43               | 350                         | 22                  | 905                            | 794                          | 205                                | 0.58 | 20    | “      | 7          | 41.0                     | -2.9                    | -1.3               |
|                     | BC50      | 0.55 | 43               | 350                         | 22                  | 565                            | 794                          | 512                                | 0.58 | 50    | “      | 7          | 42.2                     | 0.0                     | 0.6                |
|                     | GRC       | 0.55 | 43               | 350                         | 22                  | 1042                           | 834                          | 0                                  | 0.56 | 0     | “      | 7          | 43.5                     | 0.0                     | -1.3               |
|                     | GC20      | 0.55 | 43               | 350                         | 22                  | 833                            | 794                          | 205                                | 0.57 | 20    | “      | 7          | 42.2                     | -2.8                    | -0.4               |

|                             |      |      |    |     |    |      |     |      |      |     |     |    |      |       |       |
|-----------------------------|------|------|----|-----|----|------|-----|------|------|-----|-----|----|------|-------|-------|
|                             | GC50 | 0.55 | 43 | 350 | 22 | 517  | 794 | 512  | 0.56 | 50  | “   | 7  | 42.2 | -2.8  | 1.0   |
|                             | LRC  | 0.55 | 43 | 350 | 22 | 1003 | 834 | 0    | 0.55 | 0   | “   | 28 | 53.3 | 0.0   | 1.1   |
|                             | LC20 | 0.55 | 43 | 350 | 22 | 802  | 794 | 205  | 0.56 | 20  | “   | 28 | 53.3 | 0.0   | 0.6   |
|                             | LC50 | 0.55 | 43 | 350 | 22 | 501  | 794 | 512  | 0.56 | 50  | “   | 28 | 54.5 | 2.3   | 1.3   |
|                             | MRC  | 0.55 | 43 | 350 | 22 | 0    | 794 | 1023 | 0.56 | 100 | “   | 28 | 52.0 | -2.3  | -5.5  |
|                             | BRC  | 0.55 | 43 | 350 | 22 | 1131 | 834 | 0    | 0.58 | 0   | “   | 28 | 56.9 | 0.0   | -4.3  |
|                             | BC20 | 0.55 | 43 | 350 | 22 | 905  | 794 | 205  | 0.58 | 20  | “   | 28 | 54.5 | -4.3  | -1.3  |
|                             | BC50 | 0.55 | 43 | 350 | 22 | 565  | 794 | 512  | 0.58 | 50  | “   | 28 | 54.5 | -4.3  | 0.6   |
|                             | GRC  | 0.55 | 43 | 350 | 22 | 1042 | 834 | 0    | 0.56 | 0   | “   | 28 | 58.1 | 0.0   | -1.3  |
|                             | GC20 | 0.55 | 43 | 350 | 22 | 833  | 794 | 205  | 0.57 | 20  | “   | 28 | 54.5 | -6.3  | -0.4  |
|                             | GC50 | 0.55 | 43 | 350 | 22 | 517  | 794 | 512  | 0.56 | 50  | “   | 28 | 50.8 | -12.6 | -     |
|                             | LRC  | 0.55 | 43 | 350 | 22 | 1003 | 834 | 0    | 0.55 | 0   | “   | 56 | 55.7 | 0.0   | 1.1   |
|                             | LC20 | 0.55 | 43 | 350 | 22 | 802  | 794 | 205  | 0.56 | 20  | “   | 56 | 61.7 | 10.9  | 0.6   |
|                             | LC50 | 0.55 | 43 | 350 | 22 | 501  | 794 | 512  | 0.56 | 50  | “   | 56 | 60.5 | 8.7   | 1.3   |
|                             | MRC  | 0.55 | 43 | 350 | 22 | 0    | 794 | 1023 | 0.56 | 100 | “   | 56 | 58.1 | 4.4   | -5.5  |
|                             | BRC  | 0.55 | 43 | 350 | 22 | 1131 | 834 | 0    | 0.58 | 0   | “   | 56 | 62.9 | 0.0   | -4.3  |
|                             | BC20 | 0.55 | 43 | 350 | 22 | 905  | 794 | 205  | 0.58 | 20  | “   | 56 | 60.5 | -3.8  | -1.3  |
|                             | BC50 | 0.55 | 43 | 350 | 22 | 565  | 794 | 512  | 0.58 | 50  | “   | 56 | 60.5 | -3.8  | 0.6   |
|                             | GRC  | 0.55 | 43 | 350 | 22 | 1042 | 834 | 0    | 0.56 | 0   | “   | 56 | 61.7 | 0.0   | -1.3  |
|                             | GC20 | 0.55 | 43 | 350 | 22 | 833  | 794 | 205  | 0.57 | 20  | “   | 56 | 58.1 | -5.9  | -0.4  |
|                             | GC50 | 0.55 | 43 | 350 | 22 | 517  | 794 | 512  | 0.56 | 50  | “   | 56 | 58.1 | -5.9  | 1.0   |
| Uygunoğlu<br>et al.<br>[46] | LS-1 | 0.31 | 43 | 450 | 22 | 986  | 720 | 0    | 0.58 | 0   | Cu. | 7  | 50.0 | 0.0   | 2.3   |
|                             | LS-2 | 0.34 | 43 | 450 | 22 | 966  | 706 | 0    | 0.58 | 0   | “   | 7  | 46.0 | 0.0   | 0.5   |
|                             | LS-3 | 0.37 | 43 | 450 | 22 | 947  | 692 | 0    | 0.58 | 0   | “   | 7  | 42.0 | 0.0   | -1.6  |
|                             | LS-4 | 0.40 | 43 | 450 | 22 | 927  | 678 | 0    | 0.58 | 0   | “   | 7  | 39.4 | 0.0   | -3.4  |
|                             | MW-1 | 0.31 | 43 | 450 | 22 | 0    | 720 | 1109 | 0.61 | 100 | “   | 7  | 44.0 | -12.0 | -8.3  |
|                             | MW-2 | 0.34 | 43 | 450 | 22 | 0    | 706 | 1087 | 0.61 | 100 | “   | 7  | 42.0 | -8.7  | -13.0 |
|                             | MW-3 | 0.37 | 43 | 450 | 22 | 0    | 692 | 1065 | 0.61 | 100 | “   | 7  | 37.0 | -11.9 | -18.2 |
|                             | MW-4 | 0.40 | 43 | 450 | 22 | 0    | 678 | 1043 | 0.61 | 100 | “   | 7  | 34.0 | -13.7 | -22.9 |

|                                        |      |      |    |     |    |      |     |      |      |     |      |    |      |       |       |
|----------------------------------------|------|------|----|-----|----|------|-----|------|------|-----|------|----|------|-------|-------|
|                                        | LS-1 | 0.31 | 43 | 450 | 22 | 986  | 720 | 0    | 0.58 | 0   | “    | 28 | 57.0 | 0.0   | 2.3   |
|                                        | LS-2 | 0.34 | 43 | 450 | 22 | 966  | 706 | 0    | 0.58 | 0   | “    | 28 | 57.0 | 0.0   | 0.5   |
|                                        | LS-3 | 0.37 | 43 | 450 | 22 | 947  | 692 | 0    | 0.58 | 0   | “    | 28 | 56.0 | 0.0   | -1.6  |
|                                        | LS-4 | 0.40 | 43 | 450 | 22 | 927  | 678 | 0    | 0.58 | 0   | “    | 28 | 55.6 | 0.0   | -3.4  |
|                                        | MW-1 | 0.31 | 43 | 450 | 22 | 0    | 720 | 1109 | 0.61 | 100 | “    | 28 | 53.6 | -6.0  | -8.3  |
|                                        | MW-2 | 0.34 | 43 | 450 | 22 | 0    | 706 | 1087 | 0.61 | 100 | “    | 28 | 50.0 | -12.3 | -13.0 |
|                                        | MW-3 | 0.37 | 43 | 450 | 22 | 0    | 692 | 1065 | 0.61 | 100 | “    | 28 | 42.0 | -25.0 | -18.2 |
|                                        | MW-4 | 0.40 | 43 | 450 | 22 | 0    | 678 | 1043 | 0.61 | 100 | “    | 28 | 38.0 | -31.7 | -22.9 |
| Hebhoub<br>et al.<br>[42] <sup>1</sup> | 0    | 0.50 | 43 | 350 | 25 | 1155 | 770 | 0    | 0.60 | 0   | Cyl. | 14 | 30.3 | 0.0   | 5.9   |
|                                        | 25   | 0.50 | 43 | 350 | 25 | 866  | 770 | 289  | 0.60 | 25  | “    | 14 | 33.4 | 10.5  | 12.0  |
|                                        | 50   | 0.50 | 43 | 350 | 25 | 578  | 770 | 578  | 0.60 | 50  | “    | 14 | 27.3 | -9.8  | -     |
|                                        | 75   | 0.50 | 43 | 350 | 25 | 289  | 770 | 866  | 0.60 | 75  | “    | 14 | 39.6 | 30.8  | -     |
|                                        | 100  | 0.50 | 43 | 350 | 25 | 0    | 770 | 1155 | 0.60 | 100 | “    | 14 | 35.2 | 16.4  | 14.6  |
|                                        | 0    | 0.50 | 43 | 350 | 25 | 1155 | 770 | 0    | 0.60 | 0   | “    | 28 | 34.6 | 0.0   | 5.9   |
|                                        | 25   | 0.50 | 43 | 350 | 25 | 866  | 770 | 289  | 0.60 | 25  | “    | 28 | 42.1 | 21.7  | 12.0  |
|                                        | 50   | 0.50 | 43 | 350 | 25 | 578  | 770 | 578  | 0.60 | 50  | “    | 28 | 40.5 | 17.2  | 15.5  |
|                                        | 75   | 0.50 | 43 | 350 | 25 | 289  | 770 | 866  | 0.60 | 75  | “    | 28 | 43.3 | 25.2  | 16.3  |
|                                        | 100  | 0.50 | 43 | 350 | 25 | 0    | 770 | 1155 | 0.60 | 100 | “    | 28 | 36.6 | 5.7   | 14.6  |
|                                        | 0    | 0.50 | 43 | 350 | 25 | 1155 | 770 | 0    | 0.60 | 0   | “    | 90 | 34.8 | 0.0   | 5.9   |
|                                        | 25   | 0.50 | 43 | 350 | 25 | 866  | 770 | 289  | 0.60 | 25  | “    | 90 | 42.1 | 21.0  | 12.0  |
|                                        | 50   | 0.50 | 43 | 350 | 25 | 578  | 770 | 578  | 0.60 | 50  | “    | 90 | 42.1 | 21.0  | 15.5  |
|                                        | 75   | 0.50 | 43 | 350 | 25 | 289  | 770 | 866  | 0.60 | 75  | “    | 90 | 43.3 | 24.5  | 16.3  |
|                                        | 100  | 0.50 | 43 | 350 | 25 | 0    | 770 | 1155 | 0.60 | 100 | “    | 90 | 36.6 | 5.1   | 14.6  |
| Binici<br>et al.<br>[20]               | C1   | 0.40 | -  | 300 | 19 | 1180 | 780 | 0    | 0.60 | 0   | Cyl. | 28 | 31.3 | 0.0   | -     |
|                                        | MC1  | 0.40 | -  | 300 | 19 | 0    | 765 | 1140 | 0.60 | 100 | “    | 28 | 54.8 | 75.4  | -     |
|                                        | C1   | 0.40 | -  | 300 | 19 | 1180 | 780 | 0    | 0.60 | 0   | “    | 90 | 40.1 | 0.0   | -     |
|                                        | MC1  | 0.40 | -  | 300 | 19 | 0    | 765 | 1140 | 0.60 | 100 | “    | 90 | 60.8 | 51.4  | -     |
|                                        | C2   | 0.40 | -  | 300 | 19 | 1180 | 770 | 0    | 0.61 | 0   | “    | 7  | 35.3 | 0.0   | -2.2  |
|                                        | MC2  | 0.40 | -  | 300 | 19 | 0    | 765 | 1150 | 0.60 | 100 | “    | 7  | 49.7 | 40.7  | 36.0  |

|                             |     |      |   |     |    |      |     |      |      |     |     |    |      |       |      |
|-----------------------------|-----|------|---|-----|----|------|-----|------|------|-----|-----|----|------|-------|------|
|                             | C2  | 0.40 | - | 300 | 19 | 1180 | 770 | 0    | 0.61 | 0   | “   | 28 | 43.7 | 0.0   | -2.2 |
|                             | MC2 | 0.40 | - | 300 | 19 | 0    | 765 | 1150 | 0.60 | 100 | “   | 28 | 58.4 | 33.5  | 36.0 |
|                             | C2  | 0.40 | - | 300 | 19 | 1180 | 770 | 0    | 0.61 | 0   | “   | 90 | 51.1 | 0.0   | -2.2 |
|                             | MC2 | 0.40 | - | 300 | 19 | 0    | 765 | 1150 | 0.60 | 100 | “   | 90 | 66.6 | 30.5  | 36.0 |
| Kore<br>and<br>Vyas<br>[47] | C1  | 0.45 | - | 426 | 20 | 1180 | 663 | 0    | 0.64 | 0   | Cu. | 7  | 25.9 | 0.0   | -2.8 |
|                             | C2  | 0.45 | - | 426 | 20 | 295  | 663 | 885  | 0.64 | 75  | “   | 7  | 21.1 | -18.5 | -5.9 |
|                             | C1  | 0.45 | - | 426 | 20 | 1180 | 663 | 0    | 0.64 | 0   | “   | 28 | 31.5 | 0.0   | -2.8 |
|                             | C2  | 0.45 | - | 426 | 20 | 295  | 663 | 885  | 0.64 | 75  | “   | 28 | 31.1 | -1.4  | -5.9 |
|                             | C1  | 0.45 | - | 426 | 20 | 1180 | 663 | 0    | 0.64 | 0   | “   | 90 | 38.8 | 0.0   | -2.8 |
|                             | C2  | 0.45 | - | 426 | 20 | 295  | 663 | 885  | 0.64 | 75  | “   | 90 | 36.7 | -5.6  | -5.9 |

<sup>1</sup>Aggregate weights were calculated according to the ratio of Fine Aggregate/Aggregate=0.4.

**Table S4.** Database of compressive strength tests of concretes containing fine and coarse marble aggregates

| Reference                 | Sample No | W/C  | Cem. Grade (MPa) | Cement (kg/m <sup>3</sup> ) | Max. Agg. Size (mm) | Coarse Marble Rep. (%) | Fine Marble Rep. (%) | Sample | Curing Day | Con. Cu. Comp Str. (MPa) | Con. Exp. Inc. Str. (%) | Est. Inc. Str. (%) |
|---------------------------|-----------|------|------------------|-----------------------------|---------------------|------------------------|----------------------|--------|------------|--------------------------|-------------------------|--------------------|
| AL-Baghdadi et al. [48]   | 0%-0%sf   | 0.35 | -                | 480                         | 20                  | 0                      | 0                    | Cu.    | 28         | 41.4                     | 0.0                     | -                  |
|                           | 10%-0%sf  | 0.35 | -                | 480                         | 20                  | 10                     | 10                   | "      | 28         | 44.7                     | 7.8                     | -                  |
|                           | 50%-0%sf  | 0.35 | -                | 480                         | 20                  | 50                     | 50                   | "      | 28         | 46.9                     | 13.1                    | -                  |
|                           | 100%-0%sf | 0.35 | -                | 480                         | 20                  | 100                    | 100                  | "      | 28         | 51.5                     | 24.3                    | -                  |
| Hebhoub et al. [42]       | 0         | 0.50 | 43               | 366                         | 25                  | 0                      | 0                    | Cyl.   | 14         | 30.5                     | 0.0                     | -                  |
|                           | 25        | 0.50 | 43               | 367                         | 25                  | 25                     | 25                   | "      | 14         | 39.1                     | 28.1                    | -                  |
|                           | 50        | 0.50 | 43               | 368                         | 25                  | 50                     | 50                   | "      | 14         | 35.1                     | 15.1                    | -                  |
|                           | 75        | 0.50 | 43               | 369                         | 25                  | 75                     | 75                   | "      | 14         | 28.9                     | -5.2                    | -                  |
|                           | 100       | 0.50 | 43               | 370                         | 25                  | 100                    | 100                  | "      | 14         | 26.2                     | -14.3                   | -                  |
|                           | 0         | 0.50 | 43               | 371                         | 25                  | 0                      | 0                    | "      | 28         | 34.7                     | 0.0                     | -                  |
|                           | 25        | 0.50 | 43               | 372                         | 25                  | 25                     | 25                   | "      | 28         | 42.5                     | 22.4                    | -                  |
|                           | 50        | 0.50 | 43               | 373                         | 25                  | 50                     | 50                   | "      | 28         | 40.5                     | 16.7                    | -                  |
|                           | 75        | 0.50 | 43               | 374                         | 25                  | 75                     | 75                   | "      | 28         | 40.5                     | 16.7                    | -                  |
|                           | 100       | 0.50 | 43               | 375                         | 25                  | 100                    | 100                  | "      | 28         | 35.2                     | 1.2                     | -                  |
|                           | 0         | 0.50 | 43               | 376                         | 25                  | 0                      | 0                    | "      | 90         | 35.2                     | 0.0                     | -                  |
|                           | 25        | 0.50 | 43               | 377                         | 25                  | 25                     | 25                   | "      | 90         | 42.8                     | 21.5                    | -                  |
|                           | 50        | 0.50 | 43               | 378                         | 25                  | 50                     | 50                   | "      | 90         | 41.0                     | 16.5                    | -                  |
|                           | 75        | 0.50 | 43               | 379                         | 25                  | 75                     | 75                   | "      | 90         | 40.6                     | 15.4                    | -                  |
|                           | 100       | 0.50 | 43               | 380                         | 25                  | 100                    | 100                  | "      | 90         | 38.4                     | 9.2                     | -                  |
| Belachia and Hebhouh [49] | B2.1.1    | 0.45 | -                | 350                         | 25                  | 0                      | 0                    | -      | 28         | 40.9                     | 0.0                     | -                  |
|                           | B2.2.1    | 0.45 | -                | 350                         | 25                  | 25                     | 25                   | -      | 28         | 45.0                     | 10.3                    | -                  |
|                           | B2.3.1    | 0.45 | -                | 350                         | 25                  | 50                     | 50                   | -      | 28         | 37.4                     | -8.5                    | -                  |
|                           | B2.4.1    | 0.45 | -                | 350                         | 25                  | 75                     | 75                   | -      | 28         | 37.1                     | -9.2                    | -                  |



|                          |        |      |    |     |      |     |     |      |    |      |       |   |
|--------------------------|--------|------|----|-----|------|-----|-----|------|----|------|-------|---|
|                          | B2.5.1 | 0.45 | -  | 350 | 25   | 100 | 100 | -    | 28 | 37.0 | -9.3  | - |
|                          | B2.1.2 | 0.55 | -  | 350 | 25   | 0   | 0   | -    | 28 | 28.5 | 0.0   | - |
|                          | B2.2.2 | 0.55 | -  | 350 | 25   | 25  | 25  | -    | 28 | 31.2 | 9.2   | - |
|                          | B2.3.2 | 0.55 | -  | 350 | 25   | 50  | 50  | -    | 28 | 30.9 | 8.2   | - |
|                          | B2.4.2 | 0.55 | -  | 350 | 25   | 75  | 75  | -    | 28 | 29.7 | 4.1   | - |
|                          | B2.5.2 | 0.55 | -  | 350 | 25   | 100 | 100 | -    | 28 | 29.4 | 3.1   | - |
|                          | B2.1.3 | 0.65 | -  | 350 | 25   | 0   | 0   | -    | 28 | 16.7 | 0.0   | - |
|                          | B2.2.3 | 0.65 | -  | 350 | 25   | 25  | 25  | -    | 28 | 26.5 | 58.2  | - |
|                          | B2.3.3 | 0.65 | -  | 350 | 25   | 50  | 50  | -    | 28 | 24.4 | 45.9  | - |
|                          | B2.4.3 | 0.65 | -  | 350 | 25   | 75  | 75  | -    | 28 | 23.9 | 42.9  | - |
|                          | B2.5.3 | 0.65 | -  | 350 | 25   | 100 | 100 | -    | 28 | 23.6 | 41.2  | - |
| Gencel<br>et al.<br>[50] | B0     | 0.40 | 43 | 400 | 12.5 | 0   | 0   | Cyl. | 7  | 58.4 | 0.0   | - |
|                          | B1     | 0.46 | 43 | 400 | 12.5 | 10  | 10  | "    | 7  | 56.0 | -4.1  | - |
|                          | B2     | 0.49 | 43 | 400 | 12.5 | 20  | 20  | "    | 7  | 52.8 | -9.6  | - |
|                          | B3     | 0.52 | 43 | 400 | 12.5 | 30  | 30  | "    | 7  | 49.5 | -15.3 | - |
|                          | B4     | 0.55 | 43 | 400 | 12.5 | 40  | 40  | "    | 7  | 45.7 | -21.8 | - |
|                          | B0     | 0.40 | 43 | 400 | 12.5 | 0   | 0   | "    | 28 | 64.0 | 0.0   | - |
|                          | B1     | 0.46 | 43 | 400 | 12.5 | 10  | 10  | "    | 28 | 60.7 | -5.2  | - |
|                          | B2     | 0.49 | 43 | 400 | 12.5 | 20  | 20  | "    | 28 | 59.2 | -7.5  | - |
|                          | B3     | 0.52 | 43 | 400 | 12.5 | 30  | 30  | "    | 28 | 55.5 | -13.3 | - |
|                          | B4     | 0.55 | 43 | 400 | 12.5 | 40  | 40  | "    | 28 | 50.4 | -21.2 | - |
